# Supplementary material for: Dysregulated m6A-Related Regulators Are Associated With Tumor Metastasis and Poor Prognosis in Osteosarcoma
Source: PubMed Central journal article supplement (PMC7280491; doi:10.3389/fonc.2020.00769), 2020-06-02
Supplement: Image_1.pdf [file Image_1.pdf]

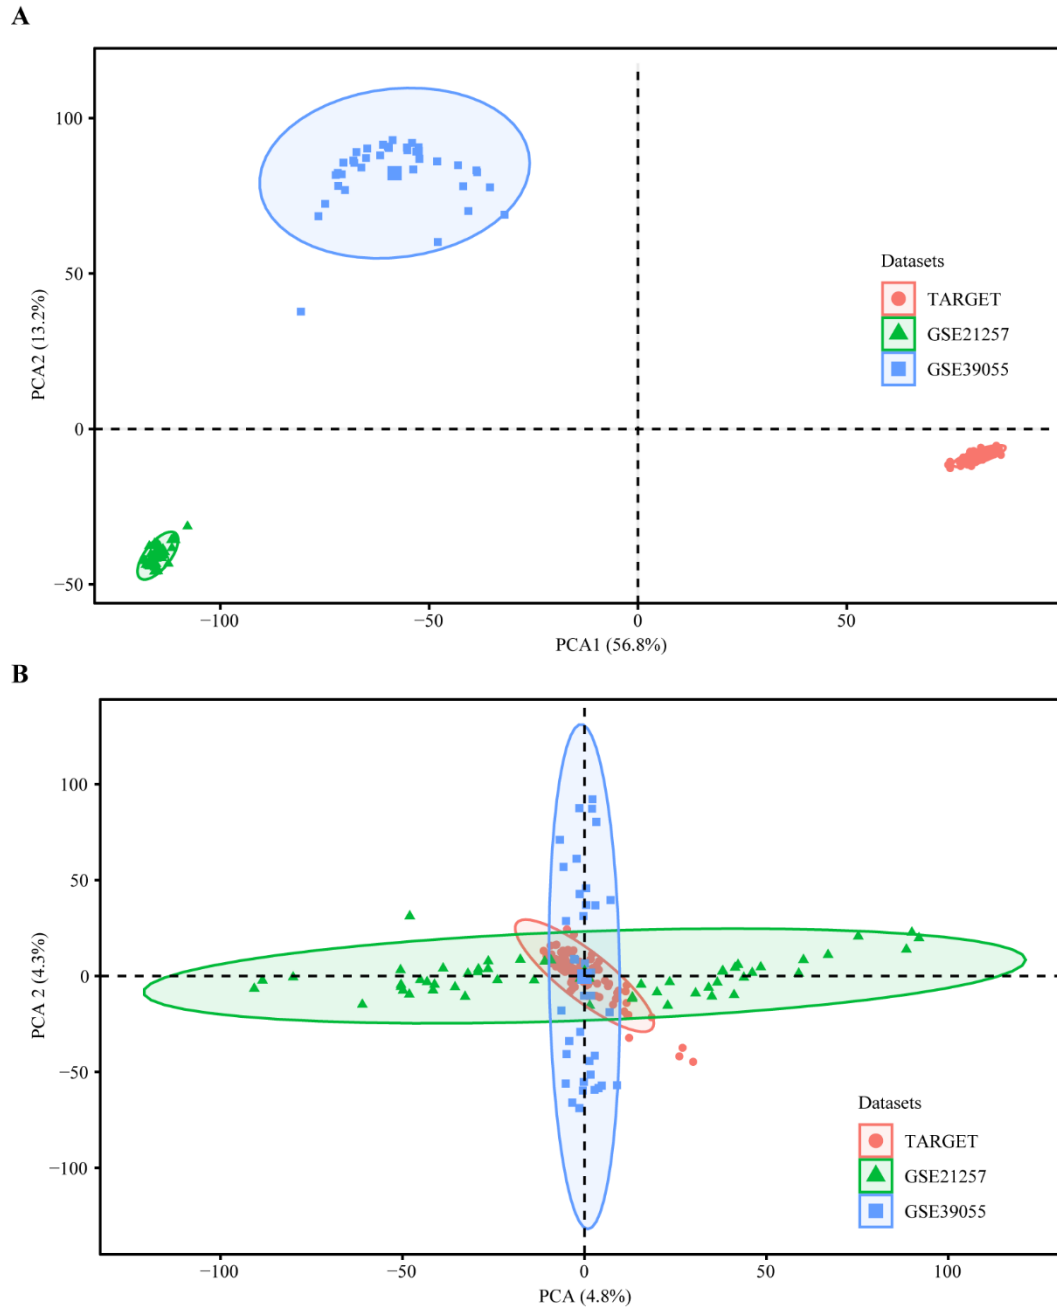

**Figure S1.** Principal Components Analysis (PCA) of three independent datasets before and after removing batch effect. **(A):** PCA before removing batch effects. **(B):** PCA after removing batch effects.
